# Supplementary material for: Trade-Offs between Growth Rate, Tree Size and Lifespan of Mountain Pine (Pinus montana) in the Swiss National Park
Source: PubMed Central journal article supplement (PMC4773076; doi:10.1371/journal.pone.0150402), 2016-03-01

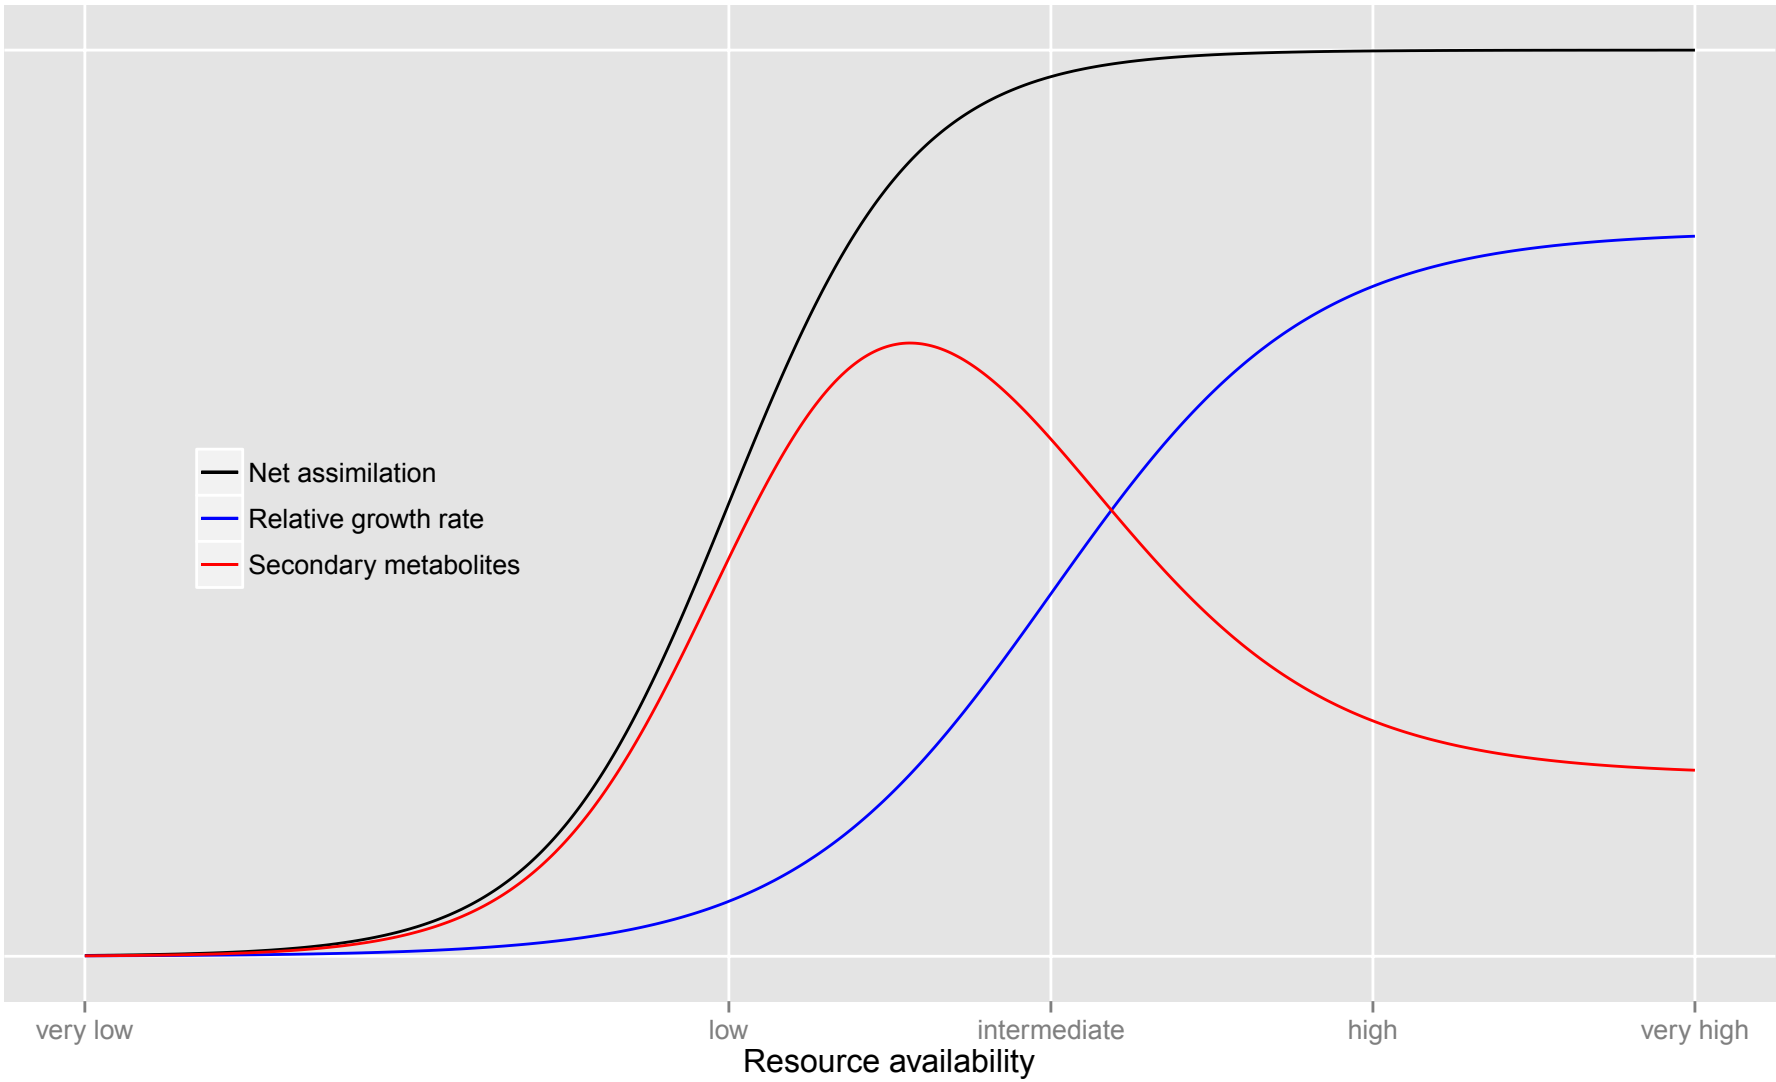

Supplement: pone.0150402.s004.pdf [file pone.0150402.s004.pdf]
